# Supplementary material for: Variable Selection on Reflectance NIR Spectra for the Prediction of TSS in Intact Berries of Thompson Seedless Grapes
Source: MDPI journal article supplement (doi:10.3390/agronomy12092113), 2022-09-05
Supplement: s1 [file s1]

## Supplementary material

**Table S1.** Statistical analysis of training sets of the MLR for the grape TSS content, when the entire datasets were used. The analyses when the datasets from variable selection were used, are given in the supplementary material.

| Parameter                   | Dataset 1<br>harvest 1<br>2016 |             | Dataset 2<br>harvest 2<br>2016 |             | Dataset 3<br>both harvests<br>2016 |             | Dataset 4<br>both harvests<br>2016 and 2017 |             |
|-----------------------------|--------------------------------|-------------|--------------------------------|-------------|------------------------------------|-------------|---------------------------------------------|-------------|
|                             | train<br>set                   | test<br>set | train<br>set                   | test<br>set | train<br>set                       | test<br>set | train<br>set                                | test<br>set |
| N                           | 41                             | 11          | 32                             | 9           | 74                                 | 19          | 132                                         | 33          |
| Mean                        | 17.35                          | 18.08       | 18.62                          | 18.93       | 17.82                              | 18.82       | 17.67                                       | 17.01       |
| Median                      | 17.63                          | 18.60       | 18.86                          | 18.74       | 17.90                              | 18.86       | 17.84                                       | 17.46       |
| Min                         | 13.44                          | 15.18       | 14.07                          | 16.12       | 13.44                              | 14.84       | 10.18                                       | 11.05       |
| Max                         | 20.93                          | 20.71       | 22.42                          | 21.58       | 22.42                              | 21.58       | 22.42                                       | 20.34       |
| Range                       | 7.49                           | 5.53        | 8.35                           | 5.46        | 8.98                               | 6.74        | 12.24                                       | 8.88        |
| Standard deviation          | 1.68                           | 1.83        | 1.97                           | 1.56        | 1.88                               | 1.76        | 2.17                                        | 0.27        |
| Coefficient of<br>variation | 0.10                           | 0.10        | 0.10                           | 0.08        | 0.10                               | 0.09        | 0.12                                        | 0.13        |

**Table S2.** Performance of Partial Least Squares (PLS) models for TSS prediction from the entire dataset of spectra.

| Parameter                                                | Dataset 1<br>harvest 1<br>2016 |       | Dataset 2<br>harvest 2<br>2016 |       | Dataset 3<br>both harvests<br>2016 |       | Dataset 4<br>both harvests<br>2016 and 2017 |       |
|----------------------------------------------------------|--------------------------------|-------|--------------------------------|-------|------------------------------------|-------|---------------------------------------------|-------|
|                                                          | c                              | cv    | c                              | cv    | c                                  | cv    | c                                           | cv    |
| Coefficient of determination<br>(R <sup>2</sup> )        | 0.922                          | 0.751 | 0.866                          | 0.189 | 0.967                              | 0.740 | 0.927                                       | 0.727 |
| Mean                                                     | 17.51                          | 17.49 | 18.69                          | 18.74 | 18.03                              | 18.04 | 17.54                                       | 17.57 |
| Standard deviation (SD)                                  | 1.671                          | 1.617 | 1.767                          | 2.181 | 1.872                              | 1.854 | 2.126                                       | 2.056 |
| Mean squared error (MSE)                                 | 0.238                          | 0.756 | 0.482                          | 2.924 | 1.121                              | 0.944 | 0.355                                       | 1.331 |
| Root mean squared error<br>(RMSE)                        | 0.488                          | 0.869 | 0.694                          | 1.710 | 0.348                              | 0.972 | 0.596                                       | 1.154 |
| Standard error of Calibration*<br>(SEC)                  | 0.234                          | 0.226 | 0.279                          | 0.345 | 0.195                              | 0.193 | 0.166                                       | 0.161 |
| Residual Prediction Deviation<br>(for calibration) (RPD) | 3.570                          | 2.003 | 2.735                          | 1.110 | 5.473                              | 1.960 | 3.705                                       | 1.914 |

c = for calculated values; cv = for cross-validation values

\* Calibration of the model is its construction from the X\_train set of spectra

**Table S3.** Performance of Partial Least Squares (PLS) models for TSS prediction from the dataset opt\_Xc.

| Parameter      | opt_Xc for<br>harvest 1 of<br>2016 |       | opt_Xc for<br>harvest 2 of<br>2016 |       | opt_Xc for<br>both harvests of<br>2016 |       | opt_Xc for<br>both harvests of<br>2016 and 2017 |       |
|----------------|------------------------------------|-------|------------------------------------|-------|----------------------------------------|-------|-------------------------------------------------|-------|
|                | c                                  | cv    | c                                  | cv    | c                                      | cv    | c                                               | cv    |
| R <sup>2</sup> | 0.998                              | 0.919 | 1.000                              | 0.871 | 0.981                                  | 0.899 | 0.957                                           | 0.884 |
| Mean           | 17.51                              | 17.51 | 18.69                              | 18.75 | 18.03                                  | 18.04 | 17.54                                           | 17.53 |
| SD             | 1.739                              | 1.642 | 1.898                              | 1.729 | 1.887                                  | 1.835 | 2.160                                           | 2.108 |
| MSE            | 0.006                              | 0.245 | 0.000                              | 0.466 | 0.067                                  | 0.366 | 0.212                                           | 0.563 |
| RMSE           | 0.078                              | 0.495 | 0.020                              | 0.683 | 0.260                                  | 0.605 | 0.460                                           | 0.751 |
| SEC            | 0.244                              | 0.230 | 0.300                              | 0.273 | 0.197                                  | 0.191 | 0.169                                           | 0.165 |
| RPD            | 22.391                             | 3.514 | 93.702                             | 2.779 | 7.334                                  | 3.146 | 4.797                                           | 2.942 |

c = for calculated values; cv = for cross-validation values

**Table S4.** Performance of Partial Least Squares (PLS) models for TSS prediction from the dataset absxcoefs.

| Parameter      | absxcoefs for<br>harvest 1 of<br>2016 |       | absxcoefs for<br>harvest 2 of<br>2016 |       | absxcoefs for<br>both harvests of<br>2016 |       | absxcoefs for<br>both harvests of<br>2016 and 2017 |       |
|----------------|---------------------------------------|-------|---------------------------------------|-------|-------------------------------------------|-------|----------------------------------------------------|-------|
|                | c                                     | cv    | c                                     | cv    | c                                         | cv    | c                                                  | cv    |
| R <sup>2</sup> | 0.998                                 | 0.919 | 1.000                                 | 0.871 | 0.981                                     | 0.899 | 0.957                                              | 0.884 |
| Mean           | 17.51                                 | 17.51 | 18.69                                 | 18.75 | 18.03                                     | 18.04 | 17.54                                              | 17.53 |
| SD             | 1.739                                 | 1.642 | 1.898                                 | 1.729 | 1.887                                     | 1.835 | 2.160                                              | 2.108 |
| MSE            | 0.006                                 | 0.245 | 0.000                                 | 0.466 | 0.067                                     | 0.366 | 0.212                                              | 0.563 |
| RMSE           | 0.078                                 | 0.495 | 0.020                                 | 0.683 | 0.260                                     | 0.605 | 0.460                                              | 0.751 |
| SEC            | 0.244                                 | 0.230 | 0.300                                 | 0.273 | 0.197                                     | 0.191 | 0.169                                              | 0.165 |
| RPD            | 22.391                                | 3.514 | 93.702                                | 2.779 | 7.334                                     | 3.146 | 4.797                                              | 2.942 |

c = for calculated values; cv = for cross-validation values

**Table S5.** Performance of MLR models for TSS prediction from the entire dataset of spectra.

| Parameter      | Dataset 1<br>harvest 1<br>2016 |       | Dataset 2<br>harvest 2<br>2016 |        | Dataset 3<br>both harvests<br>2016 |       | Dataset 4<br>both harvests<br>2016 and 2017 |       |
|----------------|--------------------------------|-------|--------------------------------|--------|------------------------------------|-------|---------------------------------------------|-------|
|                | c                              | p     | c                              | p      | c                                  | p     | c                                           | p     |
| R <sup>2</sup> | 1.000                          | 0.722 | 1.000                          | -3.314 | 1.000                              | 0.543 | 1.000                                       | 0.746 |
| Mean           | 17.35                          | 18.09 | 18.62                          | 20.70  | 17.82                              | 19.04 | 17.67                                       | 17.01 |
| SD             | 1.682                          | 1.676 | 1.977                          | 3.246  | 1.885                              | 2.287 | 2.17                                        | 2.070 |
| MSE            | 0.000                          | 0.932 | 0.000                          | 10.500 | 0.000                              | 1.194 | 0.000                                       | 1.146 |
| RMSE           | 0.000                          | 0.965 | 0.000                          | 102.46 | 0.000                              | 1.092 | 0.000                                       | 1.070 |
| SEC            | 0.266                          | 0.530 | 0.355                          | 1.147  | 0.220                              | 0.539 | 0.189                                       | 0.366 |
| RPD            | > 10 <sup>13</sup>             | 1.870 | > 10 <sup>13</sup>             | 0.481  | > 10 <sup>13</sup>                 | 1.480 | > 10 <sup>13</sup>                          | 1.986 |

c = for calculated values; p = for predicted values

**Table S6.** Performance of MLR models for TSS prediction from the opt\_Xc dataset of spectra.

| Parameter      | Dataset 1<br>harvest 1<br>2016 |       | Dataset 2<br>harvest 2<br>2016 |       | Dataset 3<br>both harvests<br>2016 |       | Dataset 4<br>both harvests<br>2016 and 2017 |        |
|----------------|--------------------------------|-------|--------------------------------|-------|------------------------------------|-------|---------------------------------------------|--------|
|                | c                              | p     | c                              | p     | c                                  | p     | c                                           | p      |
| R <sup>2</sup> | 1.000                          | 0.911 | 1.000                          | 0.503 | 1.000                              | 0.570 | 0.999                                       | -5.693 |
| Mean           | 17.35                          | 18.08 | 18.62                          | 19.56 | 17.82                              | 19.03 | 17.64                                       | 15.86  |
| SD             | 1.682                          | 1.853 | 1.977                          | 1.682 | 1.885                              | 2.282 | 2.170                                       | 6.799  |
| MSE            | 0.000                          | 0.297 | 0.000                          | 1.209 | 0.000                              | 1.341 | 0.001                                       | 34.728 |
| RMSE           | 0.000                          | 0.544 | 0.000                          | 1.099 | 0.000                              | 1.158 | 0.031                                       | 5.893  |
| SEC            | 0.266                          | 0.586 | 0.355                          | 0.594 | 0.220                              | 0.537 | 0.189                                       | 1.202  |
| RPD            | > 10 <sup>13</sup>             | 3.360 | > 10 <sup>13</sup>             | 1.418 | > 10 <sup>13</sup>                 | 1.526 | 83.438                                      | 0.386  |

c = for calculated values; p = for predicted values

**Table S7.** Performance of MLR models for TSS prediction from the absxcoefs dataset of spectra.

| Parameter      | Dataset 1<br>harvest 1<br>2016 |       | Dataset 2<br>harvest 2<br>2016 |       | Dataset 3<br>both harvests<br>2016 |       | Dataset 4<br>both harvests<br>2016 and 2017 |        |
|----------------|--------------------------------|-------|--------------------------------|-------|------------------------------------|-------|---------------------------------------------|--------|
|                | c                              | p     | c                              | p     | c                                  | p     | c                                           | p      |
| R <sup>2</sup> | 1.000                          | 0.968 | 1.000                          | 0.569 | 1.000                              | 0.687 | 0.999                                       | -5.693 |
| Mean           | 17.35                          | 18.04 | 18.62                          | 19.50 | 17.82                              | 19.02 | 17.67                                       | 15.86  |
| SD             | 1.682                          | 1.854 | 1.977                          | 1.777 | 1.885                              | 2.168 | 2.170                                       | 6.799  |
| MSE            | 1.640                          | 0.105 | 0.000                          | 1.048 | 0.000                              | 0.977 | 0.001                                       | 34.728 |
| RMSE           | 1.280                          | 0.324 | 0.000                          | 1.023 | 0.000                              | 0.988 | 0.031                                       | 5.893  |
| SEC            | 0.266                          | 0.586 | 0.355                          | 0.628 | 0.220                              | 0.511 | 0.189                                       | 1.202  |
| RPD            | > 10 <sup>13</sup>             | 5.653 | > 10 <sup>13</sup>             | 1.523 | > 10 <sup>13</sup>                 | 1.788 | 83.438                                      | 0.386  |

c = for calculated values; p = for predicted values

**Table S8.** Selected wavenumbers (cm<sup>-1</sup>) most correlated to the TSS content and in agreement with published literature on the vibration wavenumbers of sugar O-H and C-H bonds.

| Most correlated to sugars<br>(from bibliography) | Among all 110 selected<br>wavenumbers                                                                            | Among top 30 most<br>correlated wavenumbers  |
|--------------------------------------------------|------------------------------------------------------------------------------------------------------------------|----------------------------------------------|
| 5848-6452                                        | 6101.89, 5831.89, 5893.61, 6410.45,<br>6449.02, 6449.02, 6225.31, 6402.74,<br>6140.46, 6132.74, 6132.74, 6202.17 | 5415.33, 6418.17, 6233.03<br>6109.6, 6101.89 |
| 10162.6                                          | 10236.7, 10074.7, 10221.2                                                                                        | 10236.7, 10074.7                             |
| 10416.67                                         | 10498.9, 10398.7, 10676.4                                                                                        | 10676.4, 10498.9                             |
| 10989                                            | 11031.2, 11015.8, 11023.5, 11000.4,<br>10853.8, 10799.8, 10761.2                                                 | 11031.2, 11015.8, 11154.7                    |
| 9881.42-9784.74                                  | 9688.96                                                                                                          |                                              |
